# Supplementary material
Source: PubMed Central journal article supplement (PMC5463454)
Supplement: NIHMS860924-supplement-Supplemental_Data.pdf [file NIHMS860924-supplement-Supplemental_Data.pdf]

## Supplementary Data

**Supplementary Table S1.** IC<sub>50</sub> values of ipatasertib on cell viability in cell lines with or without alterations in PTEN or *PIK3CA*.

| Cell Line | Tissue Type | Ipatasertib                            |                   | <i>PIK3CA</i> <sup>c</sup>           |
|-----------|-------------|----------------------------------------|-------------------|--------------------------------------|
|           |             | IC <sub>50</sub> (μmol/L) <sup>a</sup> | PTEN <sup>b</sup> |                                      |
| 22rv1     | Prostate    | 9.09                                   |                   | HET.p.Q.546R                         |
| AN3 CA    | Endometrial | 0.63                                   | N                 |                                      |
| ASPC-1    | Pancreatic  | 10                                     |                   |                                      |
| AU565     | Breast      | 3.55                                   |                   | HET.p.L847F;HET.p.K863I; HET.p.F872I |
| BPH1      | Prostate    | 10                                     |                   |                                      |
| BPH1025   | Prostate    | 8.63                                   |                   |                                      |
| BT474     | Breast      | 0.52                                   |                   | HET.p.K111N                          |
| BT483     | Breast      | 10                                     |                   | HET.p.E542K                          |
| BT549     | Breast      | 5.51                                   | N;HOM.p.V275fs*1  |                                      |
| BxPC-3    | Pancreatic  | 10                                     |                   |                                      |
| C33A      | Cervical    | 0.60                                   | N                 |                                      |
| CAL-120   | Breast      | 10                                     |                   |                                      |
| CAL-51    | Breast      | 0.36                                   | N                 | HET.p.E542K                          |
| CAL-85-1  | Breast      | 10                                     |                   |                                      |
| CAMA-1    | Breast      | 0.26                                   | P;HOM.p.D92H      |                                      |
| Caov-3    | Ovarian     | 10                                     |                   |                                      |
| Capan-1   | Pancreatic  | 10                                     |                   |                                      |
| Capan-2   | Pancreatic  | 10                                     |                   |                                      |
| CFPAC-1   | Pancreatic  | 10                                     |                   | HET.p.I391M                          |
| Colo704   | Ovarian     | 0.93                                   | N                 |                                      |
| DLD-1     | Colon       | 10                                     |                   | HET.p.E.545K;HET.p.D549N             |
| DU145     | Prostate    | 8.41                                   |                   |                                      |
| DU4475    | Breast      | 10                                     |                   |                                      |
| ECC-1     | Endometrial | 1.05                                   | N                 |                                      |
| EFM-19    | Breast      | 0.39                                   |                   | HOM.p.H1047L                         |
| EFM-192A  | Breast      | 0.73                                   |                   | HET.p.C420R                          |
| EFO-21    | Ovarian     | 0.51                                   | N                 |                                      |
| ES-2      | Ovarian     | 10                                     |                   |                                      |
| EVSA-T    | Breast      | 0.07                                   | N                 |                                      |
| FU-OV-1   | Ovarian     | 10                                     |                   |                                      |
| HCC-1143  | Breast      | 10                                     |                   |                                      |
| HCC-1395  | Breast      | 0.45                                   |                   |                                      |
| HCC-1419  | Breast      | 10                                     |                   |                                      |

| Cell Line  | Tissue Type | Ipatasertib                            |                                   |                             |
|------------|-------------|----------------------------------------|-----------------------------------|-----------------------------|
|            |             | IC <sub>50</sub> (μmol/L) <sup>a</sup> | PTEN <sup>b</sup>                 | PIK3CA <sup>c</sup>         |
| HCC-1569   | Breast      | 0.88                                   | HETDEL.26<br>7fs*9                | HET.p.I391M                 |
| HCC-1954   | Breast      | 1.01                                   |                                   | HET.p.H1047R                |
| HCC-2218   | Breast      | 4.44                                   |                                   |                             |
| HCC-38     | Breast      | 10                                     | N                                 | HET.p.W386L                 |
| HCC-70     | Breast      | 0.53                                   | N                                 |                             |
| HCC1428    | Breast      | 10                                     |                                   |                             |
| HCT-116    | Colon       | 10                                     |                                   |                             |
| HCT-15     | Colon       | 10                                     |                                   | HET.p.E545K;HET.p.D<br>549N |
| HDQ-P1     | Breast      | 10                                     |                                   |                             |
| HEC 1-B    | Endometrial | 10                                     |                                   |                             |
| HEC-1A     | Endometrial | 5.76                                   |                                   |                             |
| HPAC       | Pancreatic  | 10                                     |                                   |                             |
| HPAF-II    | Pancreatic  | 10                                     |                                   |                             |
| Hs 766T    | Pancreatic  | 10                                     |                                   |                             |
| HS578T     | Breast      | 2.22                                   |                                   |                             |
| HT-55      | Colon       | 4.25                                   |                                   |                             |
| HT3        | Cervical    | 10                                     |                                   |                             |
| Hup T3     | Pancreatic  | 10                                     | N                                 | HET.p.H556Q                 |
| KLE        | Endometrial | 10                                     |                                   |                             |
| KM12       | Colon       | 2.63                                   | N                                 |                             |
| KP4        | Pancreatic  | 10                                     |                                   |                             |
| KPL-1      | Breast      | 1.95                                   |                                   | HET.p.E545K                 |
| LNCaP      | Prostate    | 0.11                                   | N;HOM.p.K<br>6fs*4                |                             |
| LoVo       | Colon       | 3.36                                   |                                   |                             |
| MCF7       | Breast      | 1.88                                   |                                   | HET.p.E545K                 |
| MDA-MB-175 | Breast      | 0.43                                   |                                   |                             |
| MDA-MB-231 | Breast      | 10                                     |                                   |                             |
| MDA-MB-415 | Breast      | 0.23                                   | N;HOM.p.C<br>136Y;p.T27<br>7fs*13 |                             |
| MDA-MB-436 | Breast      | 10                                     | N                                 | HOM.p.I391M                 |
| MDA-MB-453 | Breast      | 1.92                                   | HET.p.E307<br>K                   | HET.p.H1047R                |
| MDA-MB-468 | Breast      | 10                                     | N;HOM.c.25<br>3+1G>T              | HET.p.C769G;HET.p.T<br>435I |

| Cell Line  | Tissue Type | Ipatasertib                            |                   | PIK3CA <sup>c</sup>      |
|------------|-------------|----------------------------------------|-------------------|--------------------------|
|            |             | IC <sub>50</sub> (μmol/L) <sup>a</sup> | PTEN <sup>b</sup> |                          |
| MFM-223    | Breast      | 0.42                                   |                   | HET.p.1047R;HET.p..E176Q |
| MiaPaCa2   | Pancreatic  | 10                                     |                   |                          |
| MS 751     | Cervical    | 10                                     |                   |                          |
| MT-3       | Colon       | 1.66                                   |                   | HET.p.H1047R             |
| OV-90      | Ovarian     | 10                                     |                   |                          |
| Panc 02.03 | Pancreatic  | 10                                     |                   |                          |
| Panc 03.27 | Pancreatic  | 7.38                                   |                   |                          |
| Panc 04.03 | Pancreatic  | 7.22                                   |                   |                          |
| Panc 05.04 | Pancreatic  | 10                                     |                   |                          |
| Panc 08.13 | Pancreatic  | 10                                     |                   |                          |
| Panc 10.05 | Pancreatic  | 10                                     | N                 |                          |
| Panc-1     | Pancreatic  | 10                                     |                   |                          |
| PATU 8902  | Pancreatic  | 10                                     | N                 |                          |
| PATU 8988T | Pancreatic  | 10                                     | N                 | HET.p.I391M              |
| PC-3       | Prostate    | 1.37                                   | N                 | HET.p.N996H              |
| PC3M       | Prostate    | 1.45                                   | N                 |                          |
| PC3M-LN4   | Prostate    | 4.483                                  | N                 |                          |
| PC3MM2     | Prostate    | 1.55                                   | N                 |                          |
| PL45       | Pancreatic  | 8.17                                   | N                 |                          |
| PSN-1      | Pancreatic  | 10                                     |                   |                          |
| RKO        | Colon       | 10                                     |                   | HET.p.H1047R;HET.p.I391M |
| RL 95-2    | Endometrial | 0.54                                   | N                 |                          |
| SiHa       | Cervical    | 10                                     |                   |                          |
| SK-CO-1    | Colon       | 10                                     |                   |                          |
| SK-OV-3    | Ovarian     | 2.46                                   |                   | HET.p.H1047R             |
| SK-UT-1B   | Endometrial | 0.22                                   | N                 |                          |
| SKBR3      | Breast      | 0.81                                   |                   |                          |
| SU.86.86   | Pancreatic  | 10                                     | N                 |                          |
| SW 1990    | Pancreatic  | 10                                     | N                 |                          |
| T47D       | Breast      | 0.76                                   |                   | HET.p.H1047R             |
| TOV-112D   | Ovarian     | 10                                     |                   |                          |
| TOV-21G    | Ovarian     | 0.65                                   | N                 | HET.p.H1047Y             |
| ZR-75-1    | Breast      | 0.81                                   | N;HOM.pL108R      |                          |
| ZR-75-30   | Breast      | 10                                     |                   | HET.p.I391M              |

<sup>a</sup> Measured by the CellTiter-Glo Assay (Promega).

<sup>b</sup> Negative protein (N) or known mutations in the gene are noted.

<sup>c</sup> Known mutations are noted.

**Supplementary Table S2.** Percent tumor growth inhibition (%TGI) in xenograft models with or without alterations in PTEN or *PIK3CA*.

| <b>Tumor Type</b> | <b>Tumor Model</b> | <b>Ipatasertib Max %TGI</b> | <b>PTEN<sup>a</sup></b> | <b><i>PIK3CA</i> mut/amp<sup>b</sup></b> |
|-------------------|--------------------|-----------------------------|-------------------------|------------------------------------------|
| Breast            | HCC1954            | 138                         |                         | H1047R                                   |
| Breast            | KPL4               | 135                         |                         | H1047R                                   |
| Breast            | BT474M1            | 113                         |                         | K111N                                    |
| Breast            | MCF7-neo/ Her2     | 65                          |                         | E545K                                    |
| Breast            | MDA-MB-231         | 46                          |                         |                                          |
| Breast            | Fo5                | 88                          |                         |                                          |
| Colon             | HM-7               | 89                          |                         | H1047R                                   |
| Colon             | HCT-116            | -13                         |                         | H1047R                                   |
| Gastric           | HGC-27             | 126                         | N                       |                                          |
| GBM               | U87MG              | 164                         | N                       |                                          |
| Melanoma          | A2058.x1           | 40                          | N                       |                                          |
| Melanoma          | 537MEL             | 125                         | N                       |                                          |
| NSCLC             | H520.x1            | 34                          | N                       | amp                                      |
| NSCLC             | NCI-H460           | 7                           |                         | E545K                                    |
| NSCLC             | NCI-H441           | 69                          |                         |                                          |
| NSCLC             | NCI-H2122          | 41                          |                         |                                          |
| NSCLC             | EBC-1              | -11                         |                         |                                          |
| Ovarian           | TOV-21G.x1         | 128                         | N                       | H1047Y                                   |
| Ovarian           | IGROV-1            | 115                         | N                       | O1069W                                   |
| Ovarian           | SKOV3              | 40                          |                         | H1047R                                   |
| Prostate          | 22RV1              | 68                          |                         | Q546R                                    |
| Prostate          | LuCap141           | 141                         |                         | amp                                      |
| Prostate          | LNCaP              | 188                         | N                       |                                          |
| Prostate          | LuCap35V           | 97                          | Low                     |                                          |
| Prostate          | LuCaP96.1          | 96                          | Low                     |                                          |
| Prostate          | PC-3               | 93                          | N                       |                                          |
| Prostate          | DU-145.x1          | 60                          |                         |                                          |
| Prostate          | LuCap145.2         | 20                          |                         |                                          |

Amp = amplification, Max %TGI = maximum percent tumor growth inhibition, Mut = mutation, N = negative protein

<sup>a</sup> Negative protein (N) or low protein expression for PTEN is noted.

<sup>b</sup> Known mutations are noted.

**Supplementary Table S3.** PI3K/Akt pathway status in archival tumors.

Archival tissue tumor samples were collected from the majority of patients and were assessed centrally for PTEN status by immunohistochemistry (IHC) and for *PIK3CA* and/or *AKT* mutations. PTEN expression was quantified by an H-score, ranging from complete loss compared to normal stroma (H-score 0) to normal expression (H-score 400). In addition to *PIK3CA* and *AKT*, mutations from other relevant signaling pathways were also examined, including *BRAF*, *EGFR*, *ERBB2*, *FGFR3*, *FLT3*, *HRAS*, *JAK2*, *KIT*, *KRAS*, *MET*, *MYD88*, *NRAS*, and *RPPH1*.

**Supplementary Table S3.** PI3K/Akt pathway status in archival tumors.

| Tumor Type         | Ipatasertib (mg) | PTEN H-score | <i>PIK3CA/AKT</i> Mutations | Other Mutations  |
|--------------------|------------------|--------------|-----------------------------|------------------|
| Gastric            | 25               | N/A          | N/A                         | N/A              |
| Ovarian            | 25               | 0            | MND                         | MND              |
| Thyroid, Papillary | 25               | 50           | MND                         | MND              |
| Chondrosarcoma     | 50               | N/A          | MND                         | MND              |
| Colon              | 50               | 200          | <i>PIK3CA</i> H1047R        | <i>KRAS</i> G12A |
| Head and Neck      | 50               | 300          | MND                         | MND              |
| Breast             | 100              | N/A          | <i>PIK3CA</i> R88Q          | MND              |
| Breast             | 100              | 300          | MND                         | MND              |
| Colon              | 100              | 130          | MND                         | MND              |
| Colon              | 200              | N/A          | MND                         | <i>KRAS</i> Q61L |
| Colon              | 200              | 100          | <i>PIK3CA</i> H1047R        | MND              |
| Renal              | 200              | 0            | MND                         | MND              |
| Cholangiocarcinoma | 400              | 300          | MND                         | MND              |
| Colon              | 400              | 250          | MND                         | MND              |
| Colon              | 400              | 300          | MND                         | <i>KRAS</i> G12A |
| Breast             | 600              | N/A          | N/A                         | N/A              |
| Breast             | 600              | N/A          | N/A                         | N/A              |
| Breast             | 600              | 0            | MND                         | MND              |
| Breast             | 600              | 0            | MND                         | MND              |
| Breast             | 600              | 0            | MND                         | <i>NRAS</i> Q61R |
| Breast             | 600              | 5            | MND                         | MND              |
| Breast             | 600              | 20           | <i>PIK3CA</i> E542K         | MND              |
| Breast             | 600              | 100          | MND                         | MND              |
| Breast             | 600              | 115          | <i>PIK3CA</i> H1047R        | MND              |
| Breast             | 600              | 155          | MND                         | MND              |
| Breast             | 600              | 165          | <i>PIK3CA</i> E545K         | <i>MET</i> N375S |
| Breast             | 600              | 200          | MND                         | <i>MET</i> 1010I |
| Breast             | 600              | 300          | <i>AKT1</i> E17K            | MND              |
| Chondrosarcoma     | 600              | N/A          | MND                         | MND              |
| Cholangiocarcinoma | 600              | 230          | MND                         | MND              |

MND = mutation not detected, N/A = not available

**Supplementary Table S3 (cont.)**

| Tumor Type      | Ipatasertib (mg) | PTEN H-score | <i>PIK3CA/AKT</i> Mutations | Other Mutations  |
|-----------------|------------------|--------------|-----------------------------|------------------|
| Colon           | 600              | 60           | MND                         | <i>KRAS</i> G12D |
| Colon           | 600              | 140          | MND                         | <i>KRAS</i> G12V |
| Colon           | 600              | 150          | MND                         | MND              |
| Colon           | 600              | 140          | MND                         | MND              |
| Endometrial     | 600              | N/A          | N/A                         | N/A              |
| Lung            | 600              | N/A          | N/A                         | N/A              |
| Neuroendocrine  | 600              | 200          | MND                         | <i>KRAS</i> G12V |
| Ovarian         | 600              | 175          | MND                         | MND              |
| Pancreatic      | 600              | N/A          | MND                         | <i>KRAS</i> G12D |
| Prostate        | 600              | N/A          | N/A                         | N/A              |
| Prostate        | 600              | N/A          | N/A                         | N/A              |
| Prostate        | 600              | N/A          | N/A                         | N/A              |
| Prostate        | 600              | N/A          | N/A                         | N/A              |
| Prostate        | 600              | 0            | MND                         | MND              |
| Prostate        | 600              | 300          | MND                         | MND              |
| Breast          | 800              | N/A          | N/A                         | N/A              |
| Colon           | 800              | 100          | MND                         | MND              |
| Colon           | 800              | 100          | MND                         | <i>KRAS</i> G12V |
| Colon           | 800              | 200          | MND                         | MND              |
| Colon           | 800              | 200          | MND                         | MND              |
| NSCLC           | 800              | 300          | MND                         | MND              |
| Unknown primary | 800              | 260          | MND                         | MND              |

MND = mutation not detected, N/A = not available



**Supplementary Table S4.** Reasons for discontinuation of study

|                     | Number (%) of Patients by Ipatasertib Daily Dose <sup>a</sup> |                |                 |                 |                 |                               |                 | All Patients<br>(n=52) <sup>c</sup> |
|---------------------|---------------------------------------------------------------|----------------|-----------------|-----------------|-----------------|-------------------------------|-----------------|-------------------------------------|
|                     | 25 mg<br>(n=3)                                                | 50 mg<br>(n=3) | 100 mg<br>(n=3) | 200 mg<br>(n=3) | 400 mg<br>(n=3) | 600 mg<br>(n=30) <sup>b</sup> | 800 mg<br>(n=7) |                                     |
| Disease progression | 3 (100)                                                       | 3 (100)        | 3 (100)         | 3 (100)         | 3 (100)         | 21 (70)                       | 6 (86)          | 42 (81)                             |
| Patient decision    | 0                                                             | 0              | 0               | 0               | 0               | 6 (20)                        | 0               | 6 (12)                              |
| Adverse event       | 0                                                             | 0              | 0               | 0               | 0               | 1 (3)                         | 1 (14)          | 2 (4)                               |
| Death               | 0                                                             | 0              | 0               | 0               | 0               | 1 (3)                         | 0               | 1 (2)                               |
| Physician decision  | 0                                                             | 0              | 0               | 0               | 0               | 1 (3)                         | 0               | 1 (2)                               |

n=number of patients.

<sup>a</sup> Patients are categorized by initial dose cohort assignment, regardless of subsequent dose modification.

<sup>b</sup> Thirty patients were enrolled in the 600 mg dosing cohort, but one enrolled patient was not treated with ipatasertib (GDC-0068); thus, 29 patients were treated.

<sup>c</sup> Fifty-two patients were enrolled in the study, but one enrolled patient was not treated with ipatasertib (GDC-0068); thus, 51 patients were treated.

**Supplementary figure S1.** Exposure plots confirm that exposures achieved in patients in the dose-escalation stage (right side) correlated with exposures in preclinical models at TGI<sub>90</sub> (left side).

Preclinical *in vivo* efficacy data with ipatasertib was obtained in multiple xenograft models, including LNCaP prostate cancer (PTEN-null), U87MG glioma (PTEN-null), HGC-27 gastric cancer (PTEN-null), LuCaP141 prostate cancer (*PIK3CA* amplified), and TOV-21G-X1 ovarian cancer (PTEN-null, *PIK3CA* H1047R mutation, and *KRAS* G13C mutation). The dose of ipatasertib that produced 90% tumor growth inhibition (TGI<sub>90</sub>) was determined in each xenograft model. The TGI<sub>90</sub> values for each cell line are graphed along the left of the panel, and the equivalent exposures obtained in patients are shown on the right.

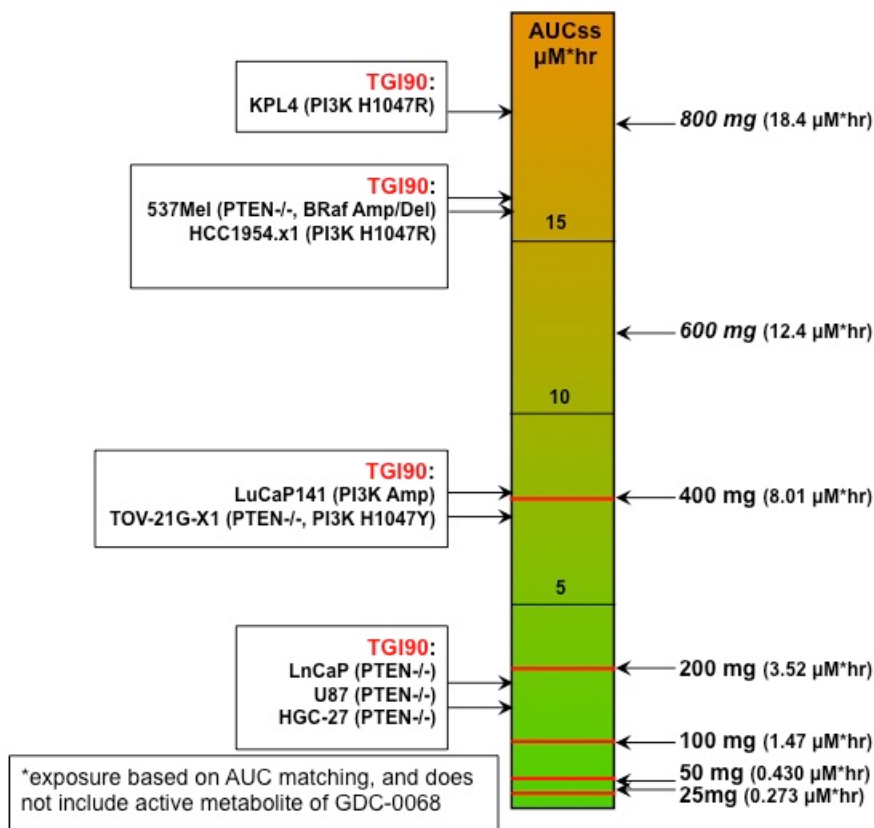

**Supplementary Figure S2.** Relationship between exposure of ipatasertib to the most common ipatasertib-related AEs of fatigue, diarrhea, nausea, and rash.

**A,** An analysis was performed to compare the dose (in mg along the horizontal axis) and exposure (at steady-state AUC in ng\*hour/mL) of ipatasertib to the grades of the four most common AEs related to ipatasertib (fatigue/asthenia, diarrhea, nausea, and rash) for all treated patients. The grade of each AE is plotted as a color-coded circle: blue for Grade 1, yellow for Grade 2, red for Grade 3 and white for no AE. Overall, the severity of each of the four most common drug-related AEs is increased relative to the dose and exposures for ipatasertib. All of the Grade 3 AEs occur at ipatasertib doses > 600 mg with exposures above 2000 ng\*hour/mL, and most of the Grade 2 AEs occur at similar high doses and exposures, except for Grade 2 fatigue which occurs at lower exposures.

**B,** Time to onset in days (graphed on the horizontal axis) for the most common AEs related to ipatasertib (fatigue, nausea, diarrhea, and rash), ranked by severity from Grade 1 to Grade 2 along the vertical axis, was analyzed. All four AEs occurred early, during Cycle 1, although nausea and diarrhea tended to occur earlier, within the first week of dosing, whereas fatigue and rash tended to occur later at 7 to 14 days of dosing. Continued chronic dosing of ipatasertib beyond Cycle 1 did not lead to the further development of these most common AEs, as no diarrhea or rash occurred in patients after the first month of dosing, and only two patients developed fatigue or nausea after the first two months of dosing.

**C,** Time to onset in days (graphed on the horizontal axis) for the worst grade for the most common AEs related to ipatasertib (ranked by severity of Grade 1, 2, or 3 for fatigue, diarrhea, nausea, and rash) was analyzed. Onset of the first Grade 1 to Grade 2 nausea or Grade 1 diarrhea both occurred on average within 7 days of dosing, whereas the higher grades of nausea and of diarrhea occurred within 14 days of dosing. The worst grade of fatigue (Grade 3) and of rash (Grade 2) also occurred later in the study, following 7 to 14 days. Chronic dosing of ipatasertib did not lead to the significant development of the higher grade AEs, as no Grade 3 nausea or Grade 2 rash is seen after the first cycle, and only 3 patients developed Grade 2 to Grade 3 fatigue or diarrhea after the first two cycles.

### Supplementary figure 2A.

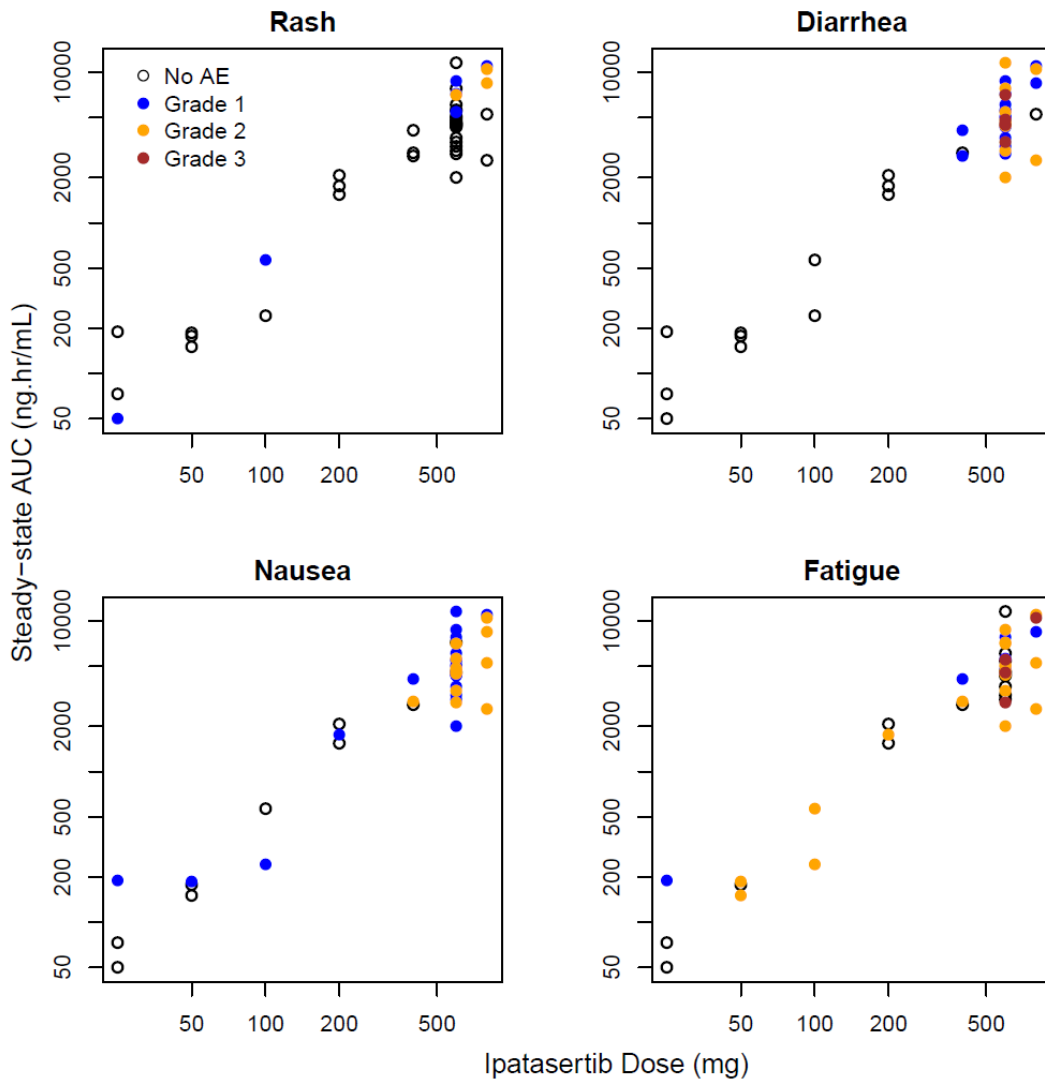

Supplementary figure 2B.

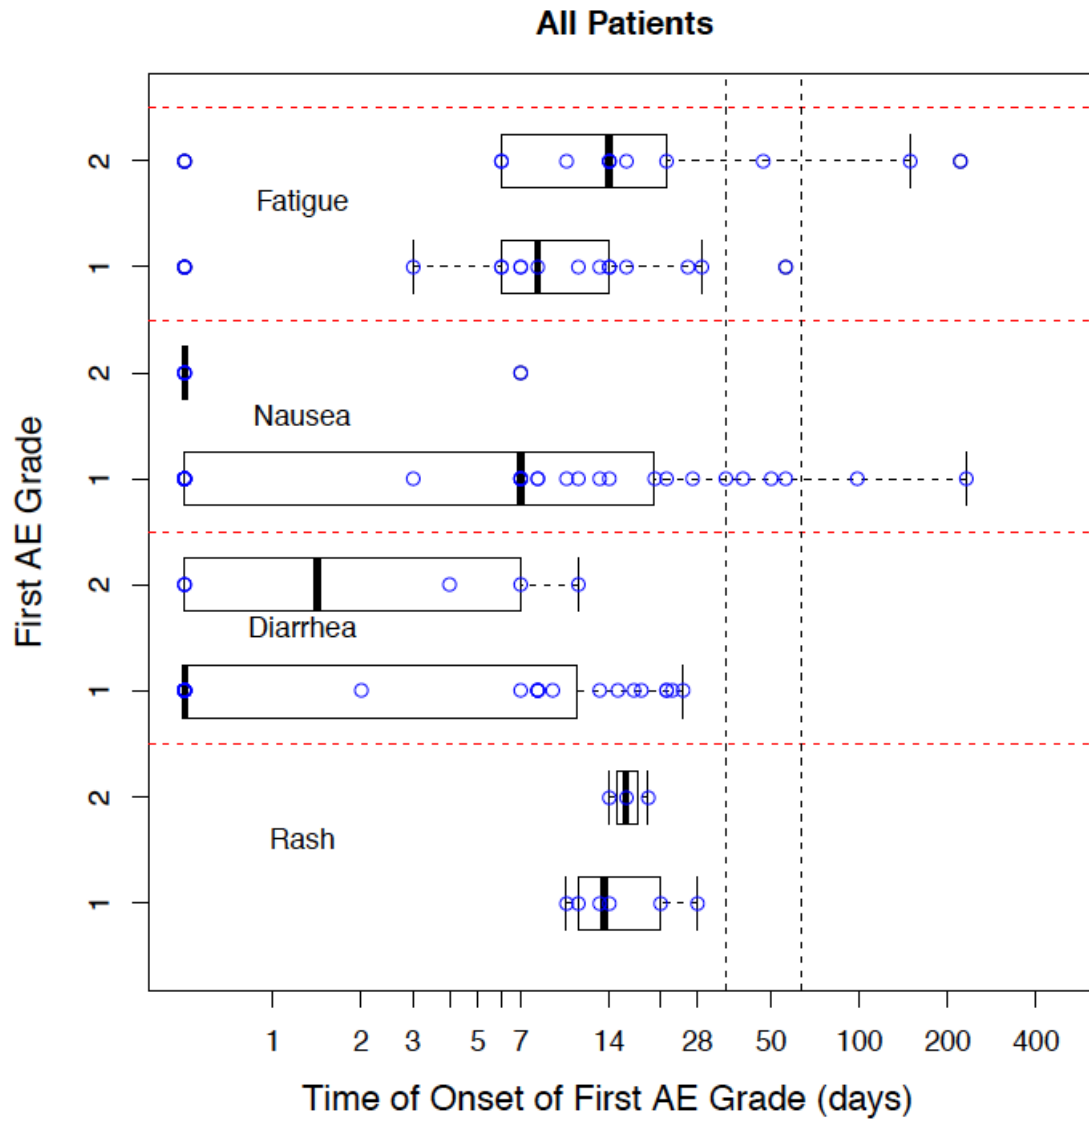

Supplementary figure 2C.

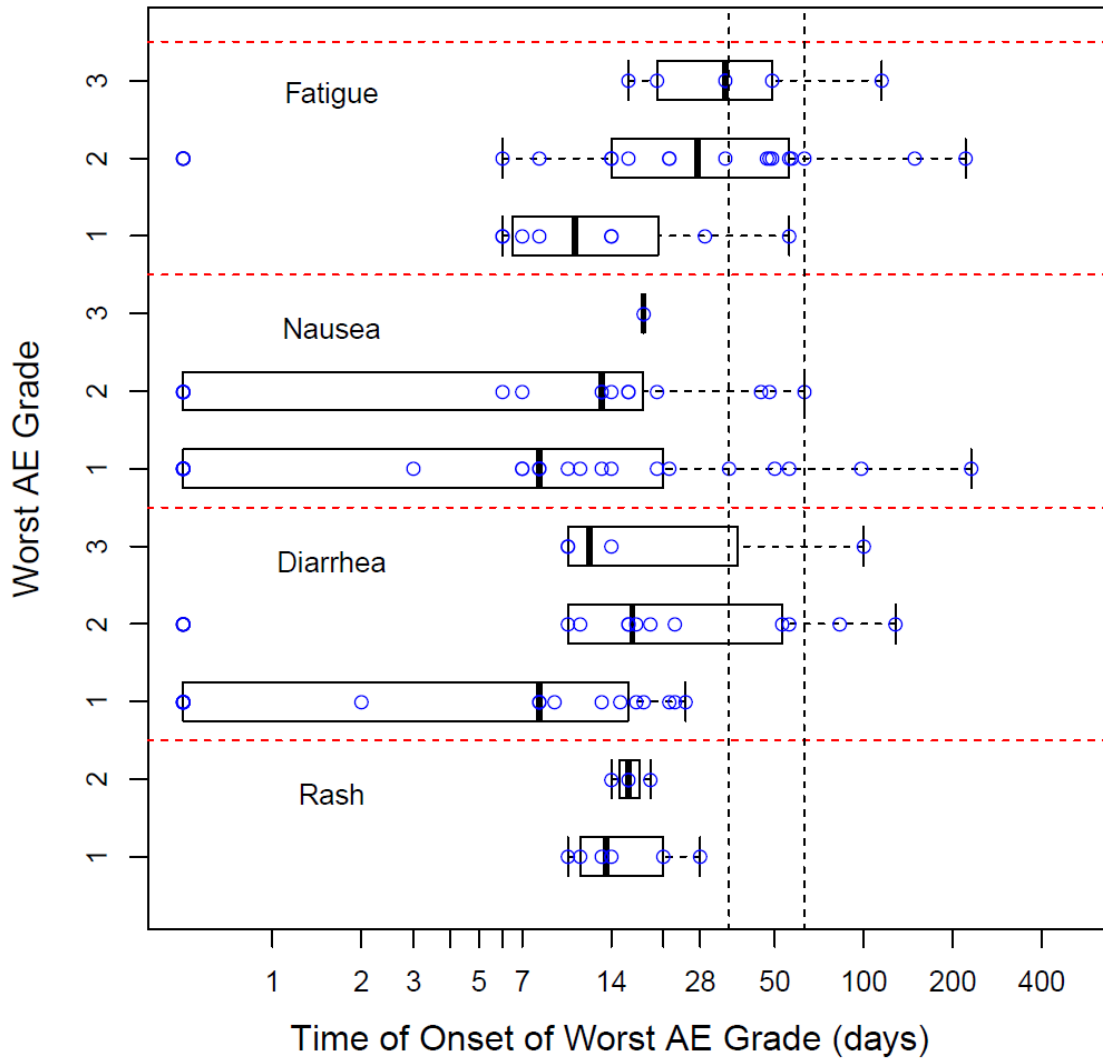

**Supplementary Table S5.** Common adverse events for ipatasertib in  $\geq 10\%$  of patients in any presented group

| MedDRA System Organ Class/<br>Preferred Term | All Patients                   |                                                                 | 600 mg Cohort                  |                                                                 |
|----------------------------------------------|--------------------------------|-----------------------------------------------------------------|--------------------------------|-----------------------------------------------------------------|
|                                              | All AEs<br>(n=51) <sup>b</sup> | Ipatasertib-<br>Related AEs <sup>a</sup><br>(n=51) <sup>b</sup> | All AEs<br>(n=29) <sup>c</sup> | Ipatasertib-<br>Related AEs <sup>a</sup><br>(n=29) <sup>c</sup> |
| Any Adverse Event, n (%)                     | 51 (100)                       | 47 (92.2)                                                       | 29 (100)                       | 29 (100)                                                        |
| Diarrhea                                     | 37 (72.5)                      | 35 (68.6)                                                       | 29 (100)                       | 29 (100%)                                                       |
| Nausea                                       | 40 (78.4)                      | 36 (70.6)                                                       | 27 (93.1)                      | 25 (86.2)                                                       |
| Vomiting                                     | 30 (58.8)                      | 26 (51)                                                         | 23 (79.3)                      | 20 (69)                                                         |
| Asthenia                                     | 32 (62.7)                      | 19 (37.3)                                                       | 17 (58.6)                      | 8 (27.6)                                                        |
| Decreased appetite                           | 22 (43.1)                      | 12 (23.5)                                                       | 10 (34.5)                      | 4 (13.8)                                                        |
| Hyperglycemia                                | 18 (35.3)                      | 17 (33.3)                                                       | 9 (31)                         | 8 (27.6)                                                        |
| Dyspepsia                                    | 13 (25.5)                      | 10 (19.6)                                                       | 7 (24.1)                       | 7 (24.1)                                                        |
| Abdominal pain upper                         | 8 (15.7)                       | 6 (11.8)                                                        | 6 (20.7)                       | 5 (17.2)                                                        |
| Back pain                                    | 11 (21.6)                      | 0                                                               | 6 (20.7)                       | 0                                                               |
| Musculoskeletal pain                         | 7 (13.7)                       | 2 (3.9)                                                         | 6 (20.7)                       | 2 (6.9)                                                         |
| Constipation                                 | 8 (15.7)                       | 0                                                               | 5 (17.2)                       | 0                                                               |
| Headache                                     | 9 (17.6)                       | 3 (5.9)                                                         | 5 (17.2)                       | 1 (3.4)                                                         |
| Anemia                                       | 6 (11.8)                       | 2 (3.9)                                                         | 4 (13.8)                       | 0                                                               |
| Cough                                        | 7 (13.7)                       | 0                                                               | 4 (13.8)                       | 0                                                               |
| Dyspnea                                      | 5 (9.8)                        | 1 (2)                                                           | 4 (13.8)                       | 1 (3.4)                                                         |
| Pyrexia                                      | 9 (17.6)                       | 0                                                               | 4 (13.8)                       | 0                                                               |
| Abdominal distension                         | 4 (7.8)                        | 2 (3.9)                                                         | 3 (10.3)                       | 2 (6.9)                                                         |
| Abdominal pain                               | 5 (9.8)                        | 2 (3.9)                                                         | 3 (10.3)                       | 1 (3.4)                                                         |
| Arthralgia                                   | 4 (7.8)                        | 1 (2)                                                           | 3 (10.3)                       | 1 (3.4)                                                         |
| Aspartate aminotransferase<br>increased      | 3 (5.9)                        | 1 (2)                                                           | 3 (10.3)                       | 1 (3.4)                                                         |
| Dry skin                                     | 3 (5.9)                        | 3 (5.9)                                                         | 3 (10.3)                       | 3 (10.3)                                                        |
| Dysgeusia                                    | 7 (13.7)                       | 6 (11.8)                                                        | 3 (10.3)                       | 2 (6.9)                                                         |

### Supplementary Table S5 (cont.)

| MedDRA System Organ Class/<br>Preferred Term | All Patients                   |                                                                 | 600 mg Cohort                  |                                                                 |
|----------------------------------------------|--------------------------------|-----------------------------------------------------------------|--------------------------------|-----------------------------------------------------------------|
|                                              | All AEs<br>(n=51) <sup>b</sup> | Ipatasertib-<br>Related AEs <sup>a</sup><br>(n=51) <sup>b</sup> | All AEs<br>(n=29) <sup>c</sup> | Ipatasertib-<br>Related AEs <sup>a</sup><br>(n=29) <sup>c</sup> |
| Hypomagnesemia                               | 4 (7.8)                        | 3 (5.9)                                                         | 3 (10.3)                       | 3 (10.3)                                                        |
| Influenza like illness                       | 3 (5.9)                        | 0                                                               | 3 (10.3)                       | 0                                                               |
| Insomnia                                     | 4 (7.8)                        | 0                                                               | 3 (10.3)                       | 0                                                               |
| Pain in extremity                            | 5 (9.8)                        | 0                                                               | 3 (10.3)                       | 0                                                               |
| Rash                                         | 7 (13.7)                       | 6 (11.8)                                                        | 3 (10.3)                       | 3 (10.3)                                                        |

AE = adverse event; MedDRA = Medical Dictionary for Regulatory Activities; n = number of patients.

Note: Patients are categorized by initial dose cohort assignment, regardless of subsequent dose modification.

<sup>a</sup> Assessed by the investigator as at least in part attributable to ipatasertib.

<sup>b</sup> Fifty-two patients were enrolled in the study, but 1 enrolled patient was not treated with ipatasertib; thus, 51 patients were treated.

<sup>c</sup> Thirty patients were enrolled in the 600-mg dosing cohort, but 1 enrolled patient was not treated with ipatasertib; thus, 29 patients were treated.



**Supplementary Table S6.** All Grade  $\geq 3$  adverse events related to ipatasertib.

| Ipatasertib Dose (mg) <sup>a</sup> | Adverse Event         | NCI CTCAE Grade | SAE | Onset Day | Duration (Days) | Action Taken with Ipatasertib |
|------------------------------------|-----------------------|-----------------|-----|-----------|-----------------|-------------------------------|
| 100                                | Hypercholesterolemia  | 3               | No  | 14        | 21              | None                          |
| 600                                | Diarrhea              | 3               | No  | 101       | 1               | None                          |
| 600                                | Diarrhea <sup>b</sup> | 3               | Yes | 11        | 3               | Dose reduced                  |
| 600                                | Diarrhea <sup>b</sup> | 3               | No  | 34        | 8               | Held                          |
| 600                                | Diarrhea              | 3               | No  | 11        | 3               | Dose reduced                  |
| 600                                | Diarrhea              | 3               | No  | 15        | 5               | Dose reduced                  |
| 600                                | Asthenia              | 3               | No  | 116       | 15              | Dose reduced                  |
| 600                                | Toxic skin eruption   | 3               | Yes | 11        | 4               | Held                          |
| 600                                | Hyperglycemia         | 3               | Yes | 28        | 2               | Held                          |
| 600                                | Hypophosphatemia      | 3               | No  | 35        | 3               | None                          |
| 800                                | Nausea <sup>c</sup>   | 3               | No  | 19        | 10              | None                          |
| 800                                | Asthenia <sup>c</sup> | 3               | No  | 21        | 8               | Discontinued                  |
| 800                                | Asthenia <sup>c</sup> | 3               | Yes | 17        | 4               | Dose reduced                  |

CTCAE = Common Terminology Criteria for Adverse Events v. 3.0; ID = identification; NCI = National Cancer Institute; QD = once daily; SAE = serious adverse event.

<sup>a</sup> Patients are categorized by initial dose cohort assignment, regardless of subsequent dose modification.

<sup>b</sup> Patient 25102 experienced the same adverse event of diarrhea twice.

<sup>c</sup> Both the Grade 3 asthenia at 800 mg in one patient, and Grade 3 nausea in another patient qualified as dose-limiting toxicities (DLTs).

**Supplementary Figure S3.** Suppression of pGSK3 $\beta$  in platelet-rich plasma versus ipatasertib concentrations.

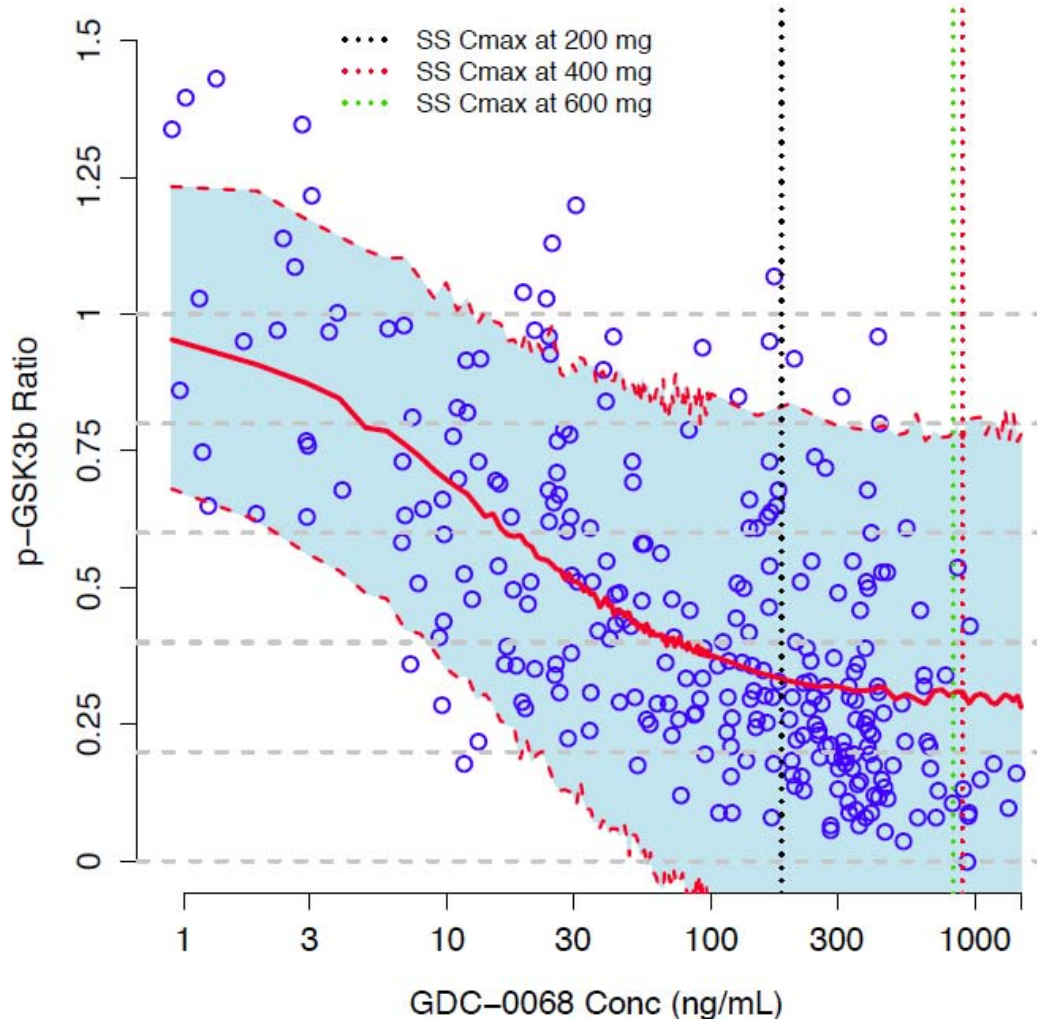

**Supplementary figure S4.** Pharmacodynamic (PD) dose-dependent elevations in glucose and insulin following treatment with ipatasertib.

**A,** After 15 days of dosing, baseline glucose (white bars, in mg/dL) and maximum post-dose glucose (gray bars) are shown for patients in Stage 1, ranked by increasing doses of ipatasertib (25 mg to 800 mg). Glucose values are generally below 200 mg/dL at ipatasertib doses < 600 mg. Beginning at 600 mg, however, higher glucoses can be observed and were more frequent at 800 mg. Elevations in glucose were transient and generally returned to baseline within 6 hours.

**B,** After 15 days of dosing, baseline insulin (white bars, in mU/L) and maximum post-dose insulin (gray) are shown for patients in Stage 1, ranked by increasing doses. Similar to the glucose elevations, insulin levels also increase beginning at 600 mg and increase further at 800 mg of ipatasertib. Elevations in insulin were transient and generally returned to baseline within 6 hours.

**C,** As an representative example, glucose (red line, in mg/dL left side) and insulin (blue, in mU/L, right side) are shown with the exposures of ipatasertib (green) for a patient from Stage 1 treated with 600 mg of ipatasertib. Blood samples were checked on Day 1 and on Day 15 in Cycle 1. Glucose and insulin increased following ipatasertib, reaching a peak at 4 hours post-dose, but both values normalized within 6 hours.

**D,** Changes in fasting pre-dose blood glucoses for all patients (at all dose levels) through Cycles 1 and 2 in Stage 1 are graphed as a percentage of the baseline values. The majority of patients show relatively stable glucose values, without significant elevations.

Supplementary figure S4A.

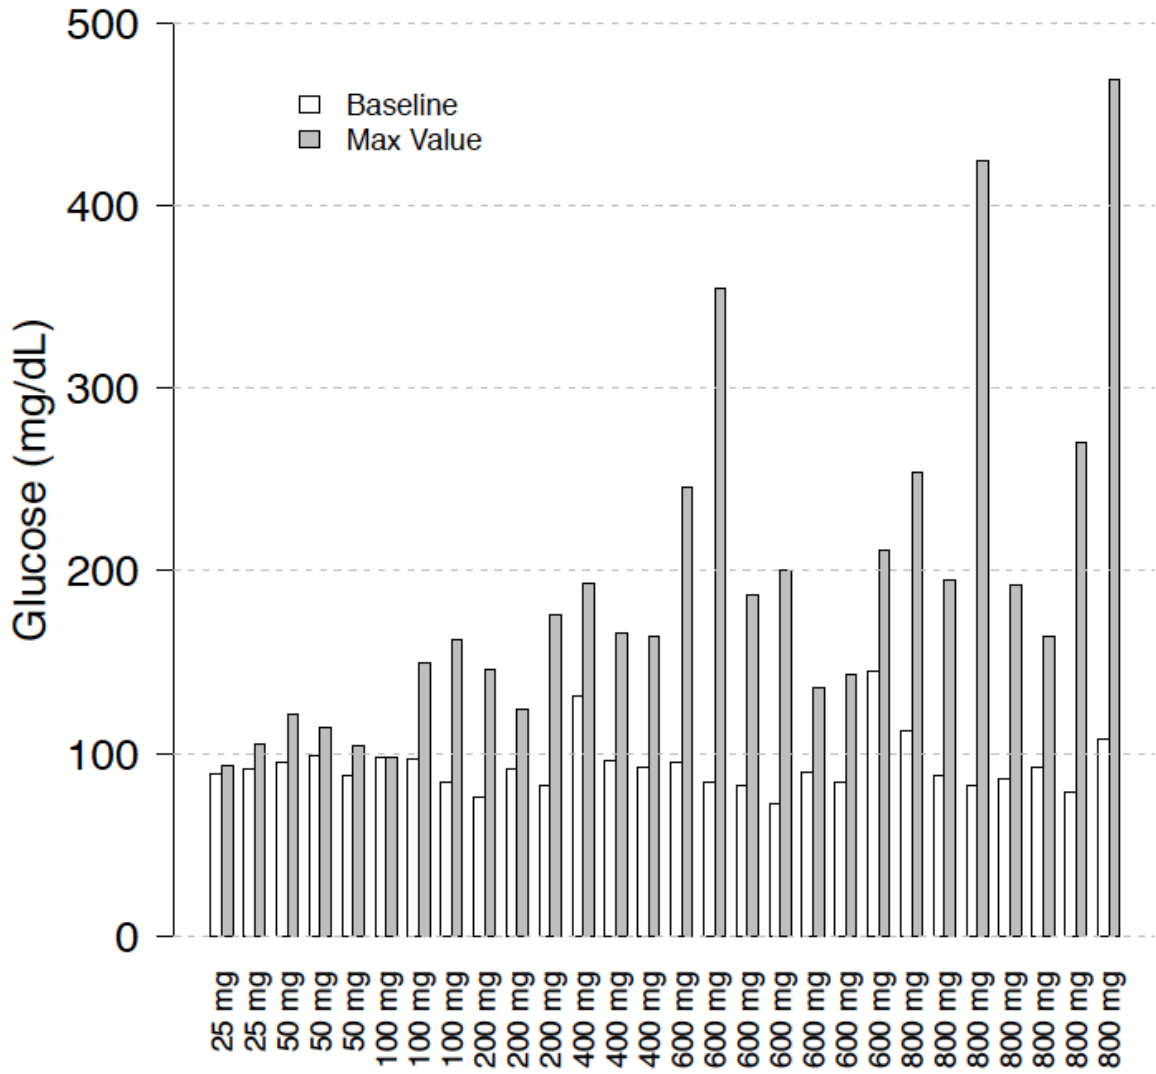

Supplementary figure S4B.

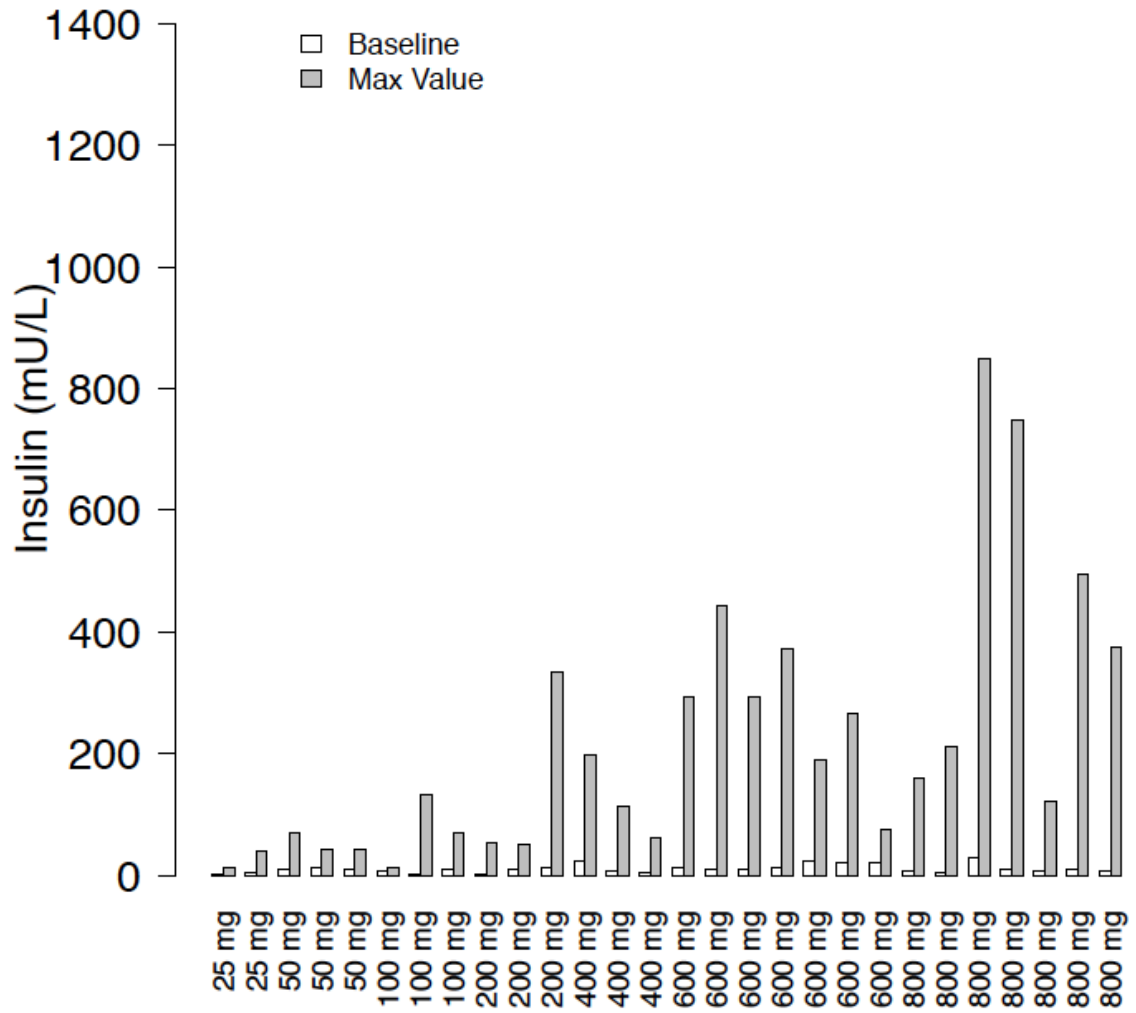

Supplementary figure S4C.

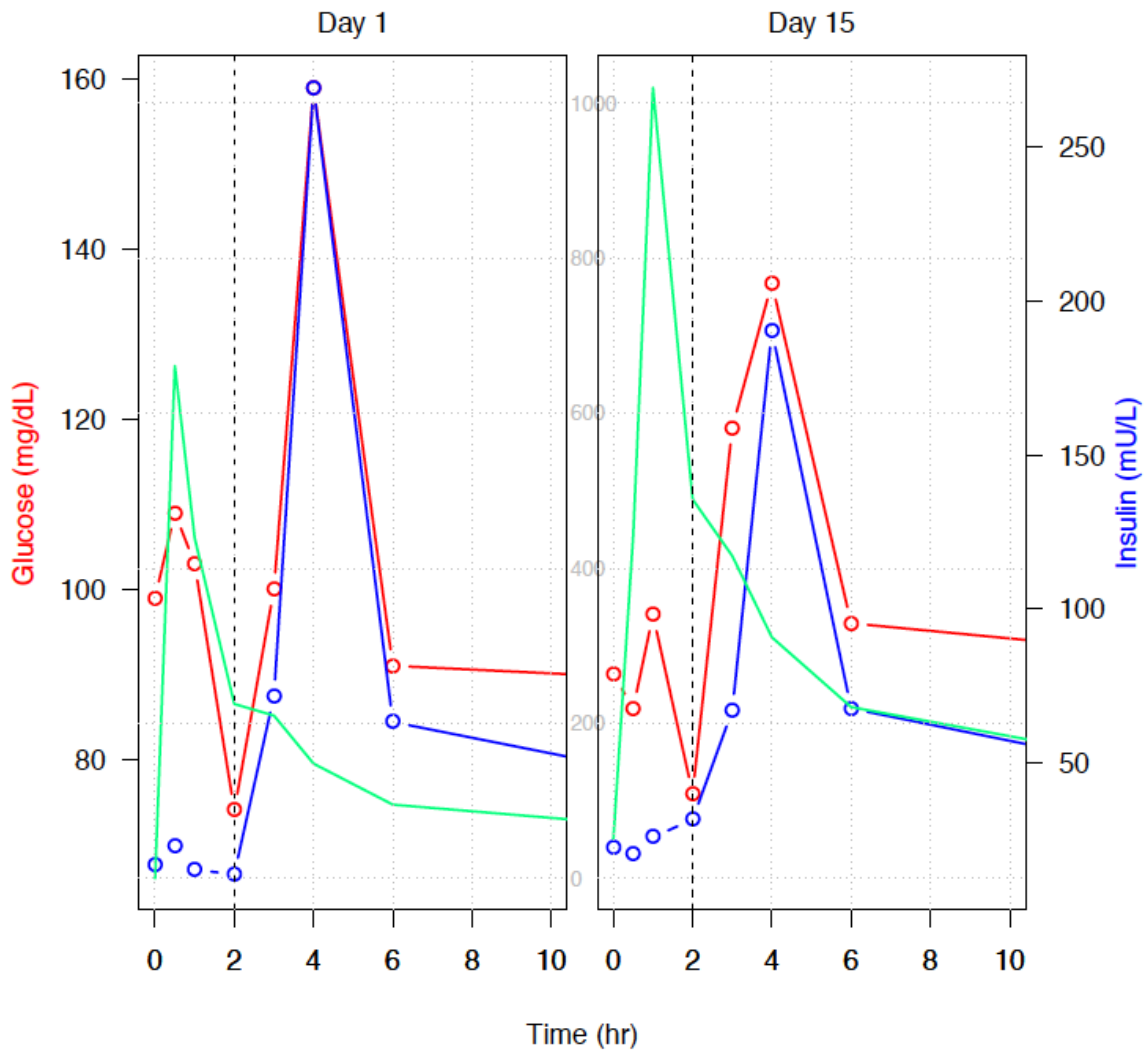

Supplementary figure S4D.

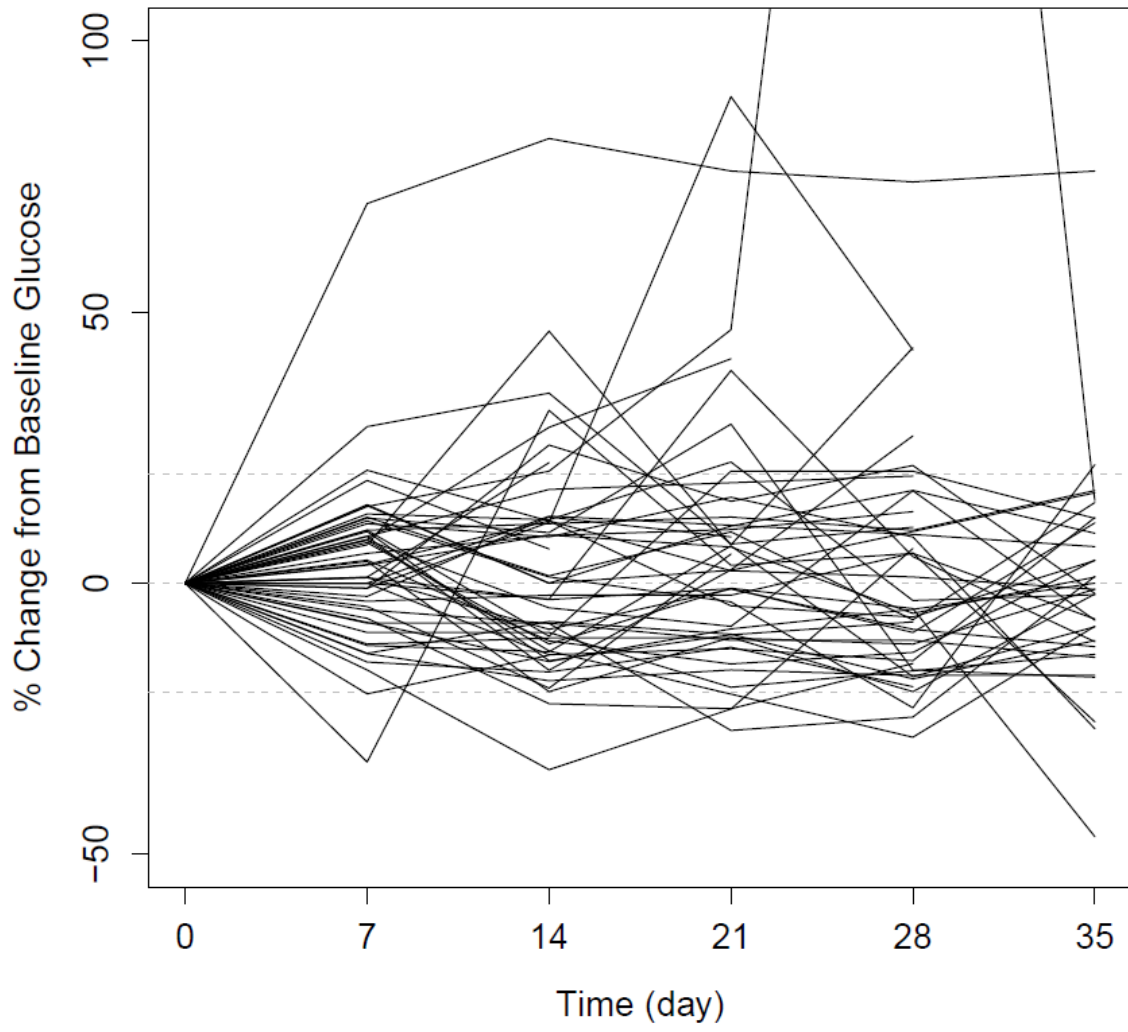

**Supplementary Table S7.** Hemoglobin A1C (HgbA1C) values for patients who had both pre-treatment and post-treatment values in Stages 1 and 2.

| Ipatasertib Dose (mg) | Patient ID | Day | HgbA1C |
|-----------------------|------------|-----|--------|
| 25                    | 10102      | 1   | 5.7    |
|                       |            | 65  | 5.2    |
|                       | 10103      | 1   | 4.8    |
|                       |            | 57  | 5.1    |
| 50                    | 10202      | 1   | 5      |
|                       |            | 43  | 5      |
| 100                   | 10301      | 1   | 5.4    |
|                       |            | 43  | 5.3    |
|                       | 10303      | 1   | 5.4    |
|                       |            | 48  | 5.4    |
| 200                   | 10401      | 1   | 5.2    |
|                       |            | 62  | 5.4    |
|                       | 10402      | 1   | 5.6    |
|                       |            | 89  | 5      |
|                       | 10403      | 1   | 5.2    |
|                       |            | 232 | 5.6    |
| 400                   | 10501      | 1   | 5.5    |
|                       |            | 58  | 5.5    |
|                       | 10502      | 1   | 5.7    |
|                       |            | 38  | 5.8    |
|                       | 10503      | 1   | 5.9    |
| 37                    | 5.7        |     |        |
| 600                   | 10701      | 1   | 6.2    |
|                       |            | 29  | 6.3    |
|                       | 10702      | 1   | 5.1    |
|                       |            | 23  | 6.1    |
|                       | 10705      | 1   | 5.7    |
|                       |            | 36  | 6.0    |
|                       | 10706      | 1   | 5.7    |
|                       |            | 77  | 5.8    |
|                       | 10708      | 1   | 6.9    |
|                       |            | 12  | 6.5    |

| Ipatasertib Dose (mg) | Patient ID | Day | HgbA1C |
|-----------------------|------------|-----|--------|
| 600                   | 25102      | 1   | 5.5    |
|                       |            | 55  | 5.5    |
|                       | 25103      | 1   | 5.6    |
|                       |            | 14  | 5.8    |
|                       | 25104      | 1   | 5.2    |
|                       |            | 365 | 5.5    |
|                       | 26101      | 1   | 5.9    |
|                       |            | 260 | 6.3    |
|                       | 26105      | 1   | 5.7    |
|                       |            | 85  | 5.8    |
|                       | 26106      | 1   | 5.6    |
| 229                   |            | 7.1 |        |
| 26110                 | 1          | 5.5 |        |
|                       | 63         | 5.7 |        |
| 26111                 | 1          | 6.8 |        |
|                       | 102        | 6.9 |        |
| 800                   | 10601      | 1   | 5.7    |
|                       |            | 28  | 6.8    |
|                       | 10603      | 1   | 4.5    |
|                       |            | 59  | 6.2    |
|                       | 10604      | 1   | 4.7    |
|                       |            | 78  | 4.6    |
|                       | 10605      | 1   | 5.3    |
|                       |            | 21  | 5.5    |
|                       | 10606      | 1   | 5.5    |
|                       |            | 71  | 6.4    |
| 10607                 | 1          | 5.9 |        |
|                       | 183        | 6.4 |        |



**Supplementary Table S8.** Summary data for patients with best radiographic stable disease (SD) by RECIST version 1.0 criteria.

| Stage | Ipatasertib Dose (mg) | Days on Study | Best RECIST Response | Cancer Diagnosis | PTEN H-score <sup>a</sup> | <i>PIK3CA/AKT</i> mutation <sup>a</sup> |
|-------|-----------------------|---------------|----------------------|------------------|---------------------------|-----------------------------------------|
| 1     | 100                   | 65            | SD                   | Ovarian          | 0                         | MND                                     |
|       | 200                   | 122           | SD                   | Chondrosarcoma   | NE                        | NE                                      |
|       | 400                   | 232           | SD                   | Colorectal       | 100                       | <i>PIK3CA</i> H1047R                    |
|       | 600                   | 77            | SD                   | Colorectal       | 150                       | MND                                     |
|       |                       |               | SD                   | Chondrosarcoma   | NE                        | NE                                      |
|       | 800                   | 28            | SD                   | Colorectal       | 100                       | MND                                     |
|       |                       |               | SD                   | Colorectal       | 200                       | MND                                     |
| 2     | 600                   | 169           | IR/SD <sup>b</sup>   | Prostate         | 300                       | MND                                     |
|       |                       | 1072          | IR/SD <sup>b</sup>   | Prostate         | 0                         | MND                                     |
|       |                       | 85            | IR/SD <sup>b</sup>   | Prostate         | NE                        | NE                                      |
|       |                       | 260           | SD                   | Breast           | 115                       | <i>PIK3CA</i> H1047R                    |
|       |                       | 55            | SD                   | Breast           | 0                         | MND                                     |
|       |                       | 85            | SD                   | Breast           | 200                       | MND                                     |
|       |                       | 229           | SD                   | Breast           | 300                       | <i>AKT1</i> E17K                        |
|       |                       | 102           | SD                   | Breast           | NE                        | NE                                      |
| 3     | 600                   | 249           | SD                   | Lung             | NE                        | NE                                      |

IR = incomplete response, mg = milligrams, MND = mutation not detected, NE = not evaluable, RECIST = Response Evaluation Criteria in Solid Tumors, SD = stable disease.

<sup>a</sup> PI3K/Akt pathway alteration was determined by central Genentech assessment. PTEN status was assessed by immunohistochemistry (H-score). *PIK3CA* or *AKT1* mutations were assessed by RT-PCR analysis.

<sup>b</sup> Patients with metastatic castration-resistant prostate cancer who had no measurable target lesion at screening and had a best RECIST response of IR/SD.
